# Supplementary material for: Thompson loop: opportunities for antitubercular drug design by targeting the weak spot in demethylmenaquinone methyltransferase protein
Source: RSC Adv. 2020 Jun 19;10(39):23466–83. doi: 10.1039/d0ra03206a (PMC9054810; doi:10.1039/d0ra03206a)
Supplement: RA-010-D0RA03206A-s001 [file RA-010-D0RA03206A-s001.pdf]

## SUPPLEMENTARY

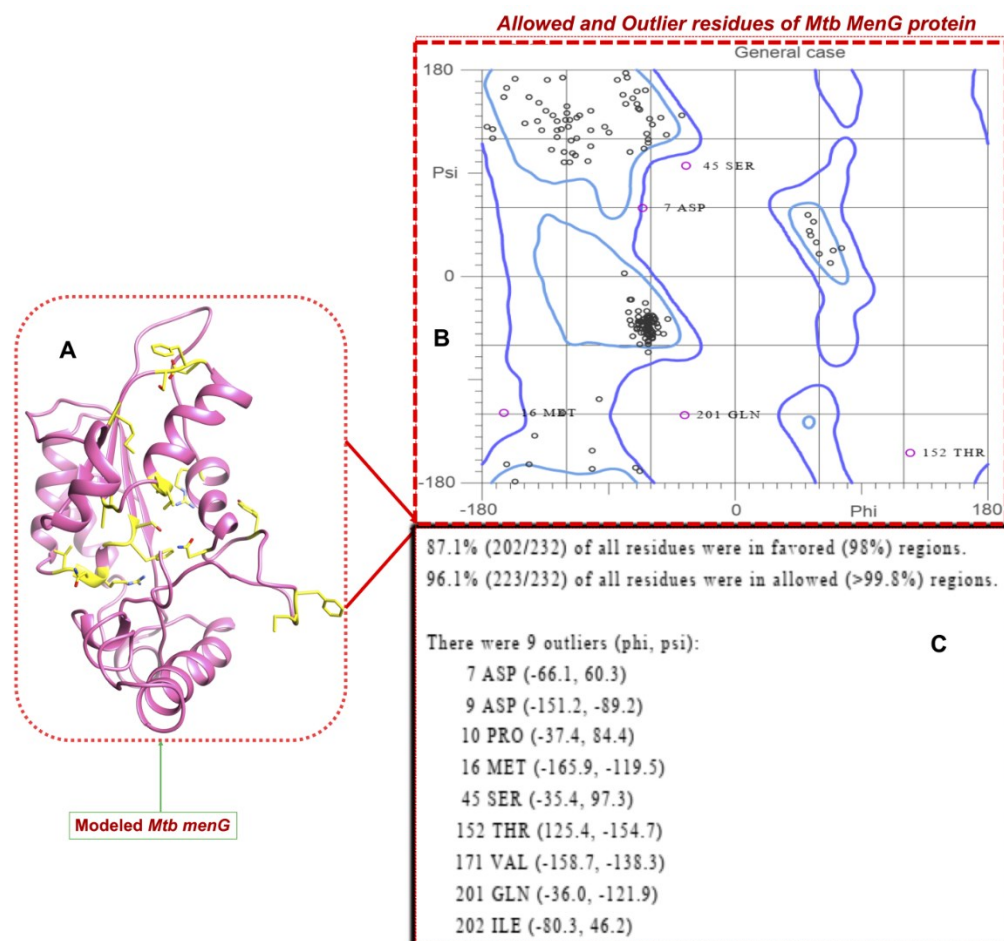

**Figure S1.** Ramachandran plot validation of the active site of the modeled *Mtb menG*.

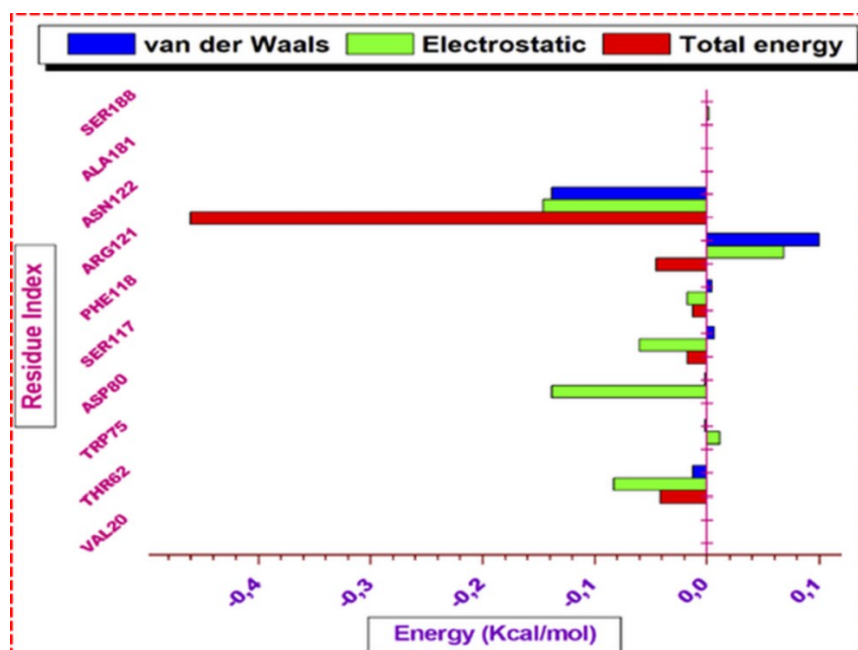

**Figure S2.** Per-residue decomposition of a *menG*-DG70 complex using the previous predicted active site that reported.

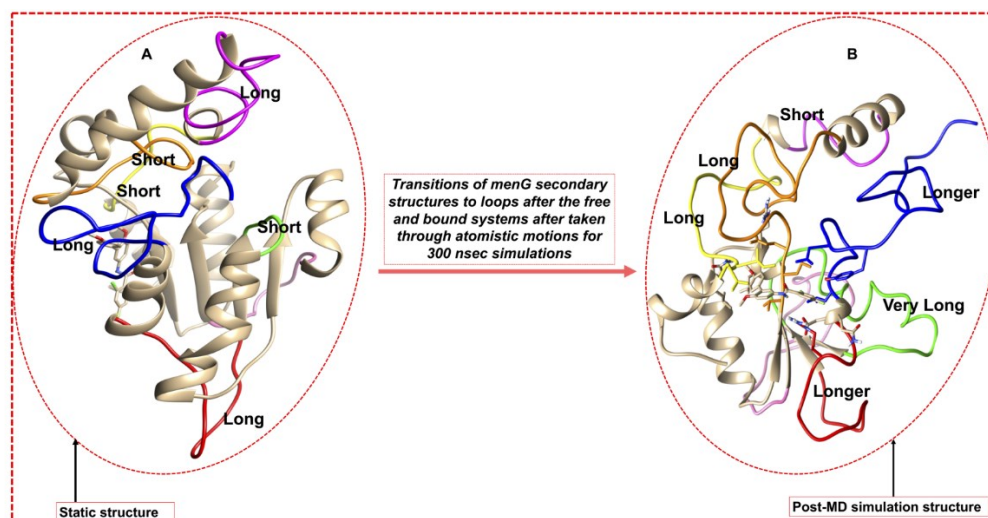

**Figure S3** Secondary structure ( $\alpha$ -helices and  $\beta$ -sheets) transformation to Loop structures over a 300 nsec trajectory.

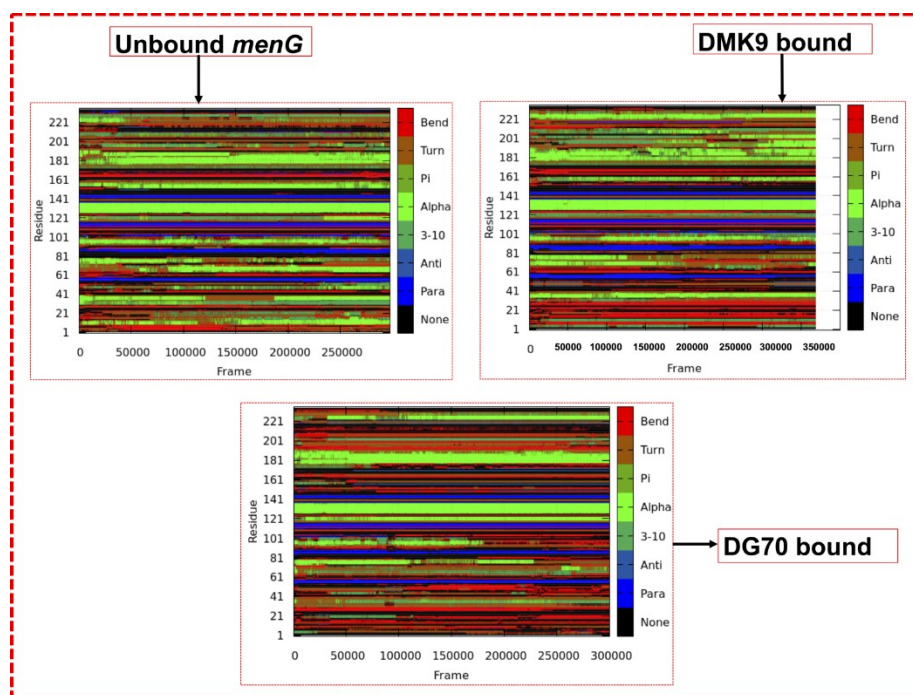

**Figure S4.** Illustrations of DSSP for *Apo* (A), *ApoDMK9* (B), and *ApoDG70* (C) systems over 300 nsec MD simulation.

**Table S1.** Mean RMSD and RMSF of the *Apo*, *DMK9*-, and *DG70*-bound Loop residues

| System           | 40-54       | 102-112     | 211-220     |
|------------------|-------------|-------------|-------------|
| Average RMSD (Å) |             |             |             |
| <i>Apo</i>       | 5.26 ± 0.63 | 1.62 ± 0.17 | 4.77 ± 0.63 |
| <i>ApoDMK9</i>   | 4.03 ± 0.84 | 1.60 ± 0.17 | 3.45 ± 0.30 |
| <i>ApoDG70</i>   | 5.84 ± 1.03 | 2.69 ± 0.98 | 3.19 ± 0.43 |
| Average RMSF (Å) |             |             |             |
| <i>Apo</i>       | 3.04 ± 0.80 | 1.32 ± 0.31 | 2.44 ± 0.67 |
| <i>ApoDMK9</i>   | 2.86 ± 0.85 | 1.22 ± 0.23 | 1.29 ± 0.17 |
| <i>ApoDG70</i>   | 3.34 ± 1.67 | 1.74 ± 0.69 | 2.07 ± 0.64 |
